# Supplementary material for: Cholesterol and steroid synthesis pathways may be involved in the inhibition of osteosarcoma cell viability by calcium-sensing receptor antagonism
Source: PeerJ. 2026 Jan 5;14:e20546. doi: 10.7717/peerj.20546 (PMC12782028; doi:10.7717/peerj.20546)
Supplement: Supplemental Information 12 [file peerj-14-20546-s012.xlsx]

## Sheet: Sheet1
Gene Symbol	Full Gene Name	Forward Primer (5′→3′)	Reverse Primer (5′→3′)	Efficiency (%)	R² Value
GAPDH	glyceraldehyde-3-phosphate dehydrogenase	GGAGCGAGATCCCTCCAAAAT	GGCTGTTGTCATACTTCTCATGG	96.1	0.996
SQLE	squalene epoxidase	GGCATTGCCACTTTCACCTAT	GGCCTGAGAGAATATCCGAGAAG	90.2	0.999
LSS	lanosterol synthase (2,3-oxidosqualene-lanosterol cyclase)	GCACTGGACGGGTGATTATGG	TCTCTTCTCTGTATCCGGCTG	91.3	0.997
EBP	emopamil binding protein (sterol isomerase)	CTCAGCACCTAAGACTGGACA	ACGACTAAGACCCCTGTGACA	90.2	0.988
DHCR24	24-dehydrocholesterol reductase	GCCGCTCTCGCTTATCTTCG	GTCTTGCTACCCTGCTCCTT	95.6	0.994
CYP51A1	cytochrome P450, family 51, subfamily A, polypeptide 1	GAAACGCAGACAGTCTCAAGA	ACGCCCATCCTTGTATGTAGC	92.3	0.993
FDFT1	farnesyl-diphosphate farnesyltransferase 1	CCACCCCGAAGAGTTCTACAA	TGCGACTGGTCTGATTGAGATA	91.6	0.993
MSMO1	methylsterol monooxygenase 1	TGCTTTGGTTGTGCAGTCATT	GGATGTGCATATTCAGCTTCCA	95.3	0.991
